# Supplementary material
Source: publisher figshare collection journal article supplement (https://acs.figshare.com/ndownloader/files/38946506)
Supplement: Supplementary file 1 [file 38946506]

## Supplementary Information

for

### The role of nanoscale morphology on the efficiency of solvent-based desalination method

Peerless, James S.<sup>1</sup>; Gulyuk, Alexey V.<sup>1</sup>; Milliken, Nina J. B.<sup>1</sup>; Kim, Gyu Dong<sup>2</sup>; Reid, Elliot<sup>3</sup>; Lee, Jae Woo<sup>4</sup>; Kim, Dooil<sup>5</sup>; Hendren, Zachary<sup>6</sup>; Choi, Young Chul<sup>7</sup>; Yingling, Yaroslava G.<sup>1\*</sup>

<sup>1</sup>. Department of Materials Science and Engineering, North Carolina State University, 911 Partners Way, Raleigh, NC, 27695, United States

<sup>2</sup>. Center for Technology Advancement & Commercialization, RTI International, 3040 Cornwallis Road, Research Triangle Park, NC 27709, United States

<sup>3</sup>. School of Civil and Environmental Engineering, Georgia Institute of Technology, North Ave NW, Atlanta, GA, 30332, United States

<sup>4</sup>. Department of Environmental Engineering, Korea University, Sejong Campus, 2511 Sejong-ro, Sejong 339-700, Korea

<sup>5</sup>. Department of Civil and Environmental Engineering, Dankook University, 152, Jukjeon-ro, Suji-gu, Yongin, Gyeonggi-do, 16890, Korea

<sup>6</sup>. A.R. Smith Department of Chemistry & Fermentation Sciences, Appalachian State University, 73 Rivers Street, Boone, NC 28608, United States

<sup>7</sup>. Research & Development Center, Saudi Aramco, P.O. Box 12232, Dhahran, 31311, Saudi Arabia

\*Corresponding Author: Address correspondence to [yara\\_yingling@ncsu.edu](mailto:yara_yingling@ncsu.edu)

## Contents

|                                                      |   |
|------------------------------------------------------|---|
| S1. Additional Background Information.....           | 2 |
| S2. Additional Simulation and Experimental Data..... | 3 |

## S1. Additional Background Information

Some additional explanations of the steps of solvent-based desalination (SBD) method that serves as a foundation in the experimental setup utilized in our work.

SBD is identified as solvent extraction desalination (SED) and temperature swing solvent extraction (TSSE), that, combined, leverage the temperature-dependent solubility of the solvent. Consecutively this allows to extract clean water from a brine solution.

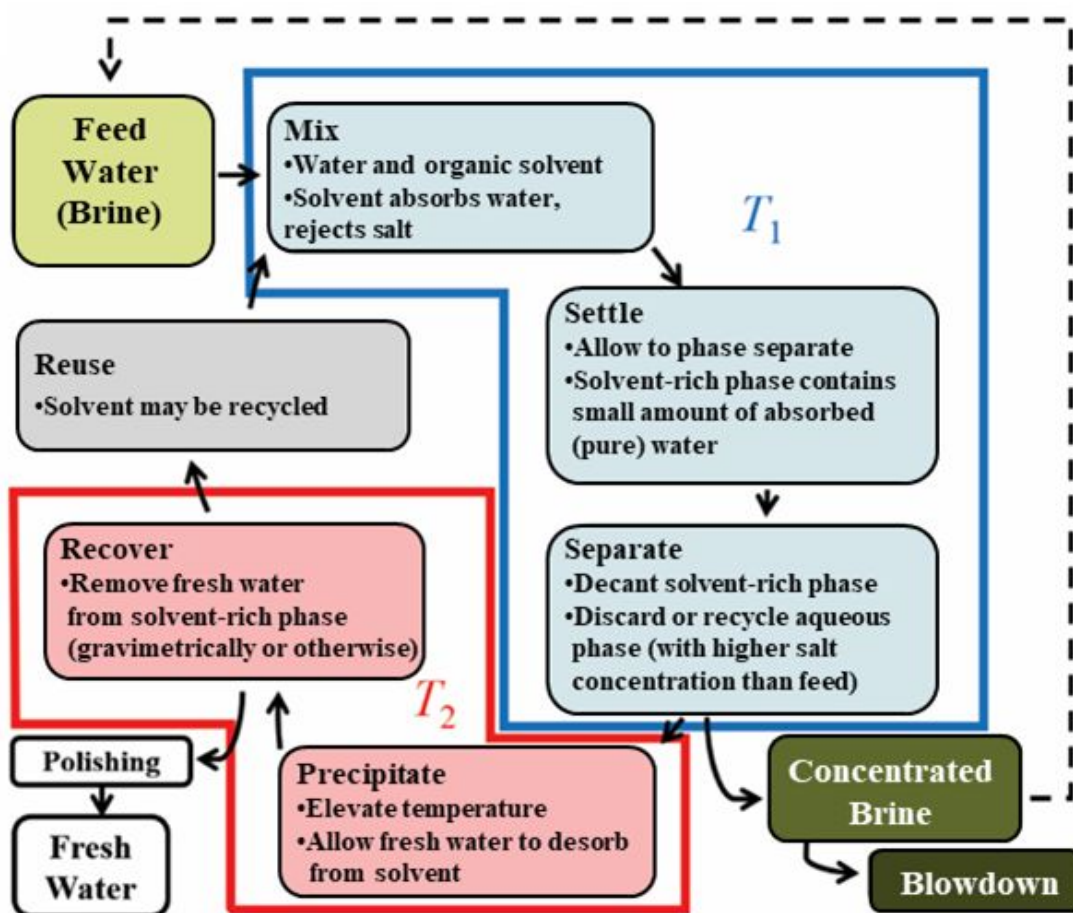

**Figure S1.** Diagram of the solvent-based desalination (SBD) process to extract water from a brine solution using an organic solvent with a temperature-dependent water solubility.

## S2. Additional Simulation and Experimental Data

**Table S1.** Details from MD simulations. Average Volume reported for last ns of simulation  $\pm$  standard deviation in that time.

| Solvent | Water Molecules (#) | Total Atoms (#) | Average Volume ( $\text{\AA}^3$ ) |
|---------|---------------------|-----------------|-----------------------------------|
| 7A      | 6,935               | 45,953          | 449,300 $\pm$ 2,280               |
| 8A      | 8,695               | 54,251          | 523,100 $\pm$ 6,570               |
| AMH     | 9,567               | 56,869          | 559,780 $\pm$ 784                 |
| BPA     | 8,256               | 49,922          | 509,590 $\pm$ 821                 |
| DBA     | 9,201               | 55,771          | 567,890 $\pm$ 829                 |
| DBE     | 9,146               | 54,612          | 569,240 $\pm$ 854                 |
| DPA     | 7,162               | 43,624          | 447,530 $\pm$ 772                 |
| EHA     | 8,852               | 54,720          | 539,580 $\pm$ 765                 |
| HMA     | 9,093               | 52,431          | 530,360 $\pm$ 779                 |
| PBA     | 8,175               | 49,679          | 507,680 $\pm$ 804                 |

**Table S2.** Details of the available experimental data. Averages and standard errors reported for two rounds of tests performed.

| Solvent                 | Water recovery (%) |      |         |       | CI Rejection (%) |      |         |       |
|-------------------------|--------------------|------|---------|-------|------------------|------|---------|-------|
|                         | 1                  | 2    | Average | STDEV | 1                | 2    | Average | STDEV |
| 1-Heptylamine (7A)      | 28.7               | 30.5 | 29.6    | 1.27  | 31.4             | 33.3 | 32.35   | 1.34  |
| Octylamine (8A)         | 26.1               | 25.3 | 25.7    | 0.57  | 24.1             | 25.6 | 24.85   | 1.06  |
| Dibutylamine (DBA)      | 3.2                | 4.5  | 3.85    | 0.92  | 99.2             | 98.9 | 99.05   | 0.21  |
| Dipropylamine (DPA)     | 9.8                | 10.3 | 10.05   | 0.35  | 93.8             | 95.6 | 94.7    | 1.27  |
| 2-Ethylhexylamine (EHA) | 10.7               | 10   | 10.35   | 0.49  | 55               | 58   | 56.5    | 2.12  |
| Propylbutylamine (PBA)  | 5.3                | 4.9  | 5.1     | 0.28  | 98.8             | 97.5 | 98.15   | 0.92  |

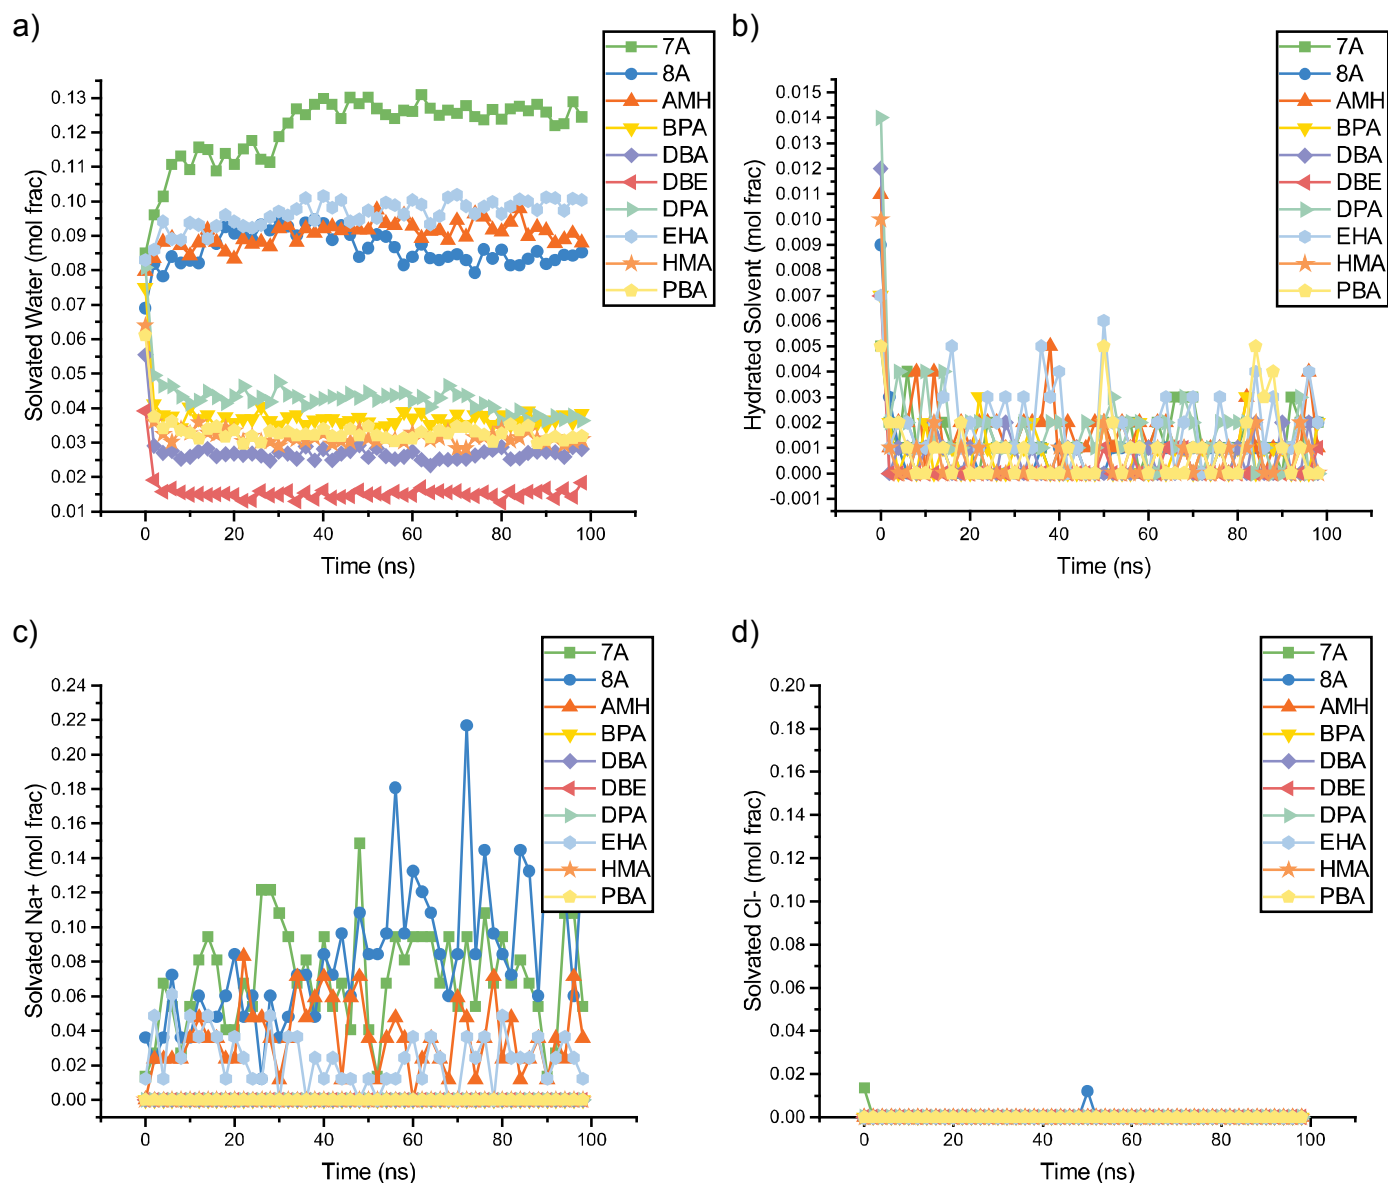

**Figure S2.** Measurements of a) solvated water, b) hydrated solvent (solvent leftover), c) solvated  $\text{Na}^+$ , and d) solvated  $\text{Cl}^-$  from last 100ns of MD simulations shown over time. Units of concentration (molar fractions) defined as the number of moles of a solvated agent divided by the total molar number of a solution tested. All measurements performed as described in Materials and Methods sections.

As it can be observed, the results show notable difference between solvation of  $\text{Na}^+$  and  $\text{Cl}^-$  ions. This can be explained as follows. Based on the ion size, comparing  $\text{Na}^+$  and  $\text{Cl}^-$ , the  $\text{Cl}^-$  ion is too large to effectively penetrate the solvated phase in the given simulation time. Though given that a bulk system would have charge neutrality, the  $\text{Cl}^-$  ions around follow along in the separation process thus making the system not being hydrated efficiently. To better visualize the process of phase formation and ion solvation, we added movies below (Movie S1 and Movie S2).



**Ordered**  
Octylamine (**8A**)

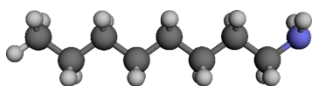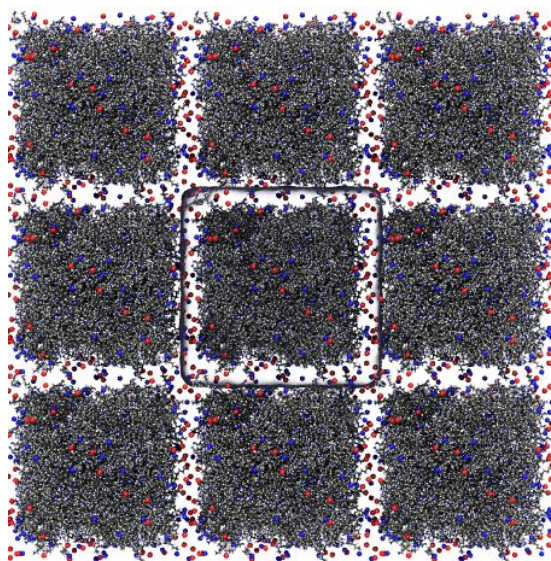

**Disordered**  
Dipropylamine (**DPA**)

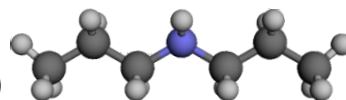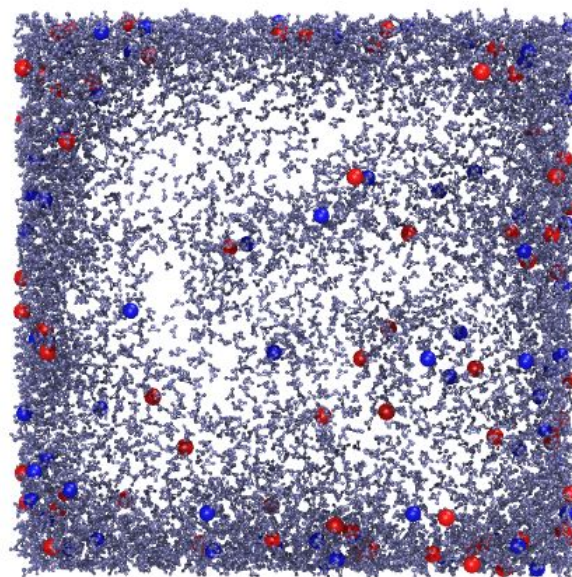

**Partial nanoscale**  
2-Ethylhexylamine (**EHA**)

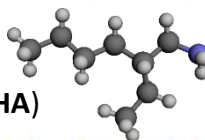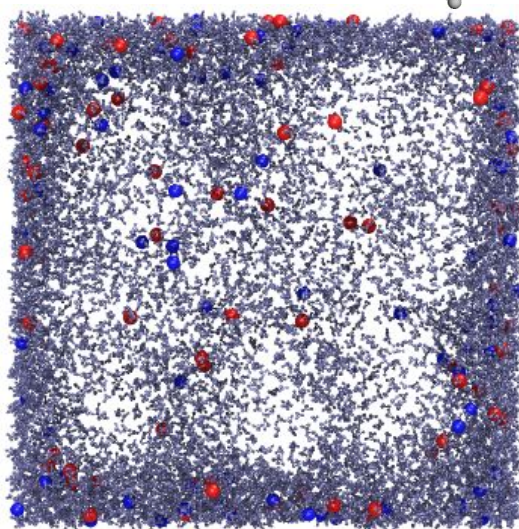

**Movie S1.** Phase separation dynamics representing three observed mechanisms: ordered phase separation (left), disordered phase separation (right), and partial nanoscale phase separation (bottom).

2-Ethylhexylamine (EHA)

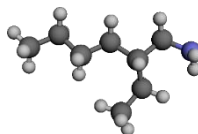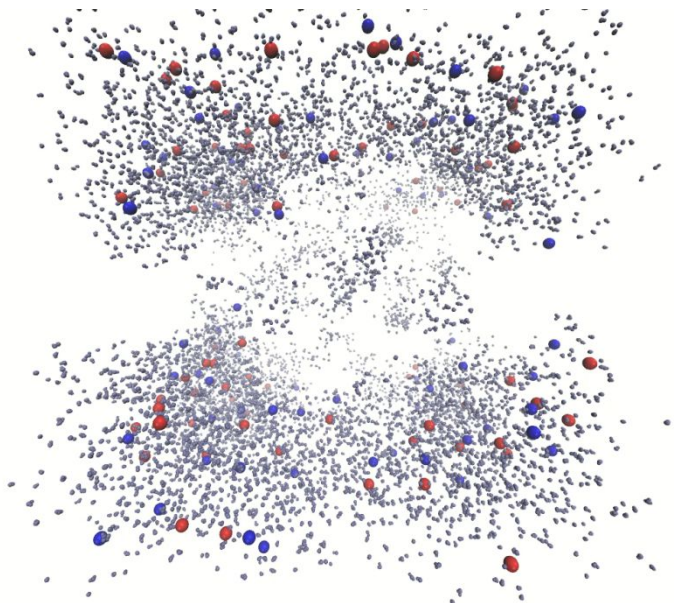

Dipropylamine (DPA)

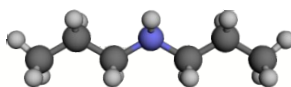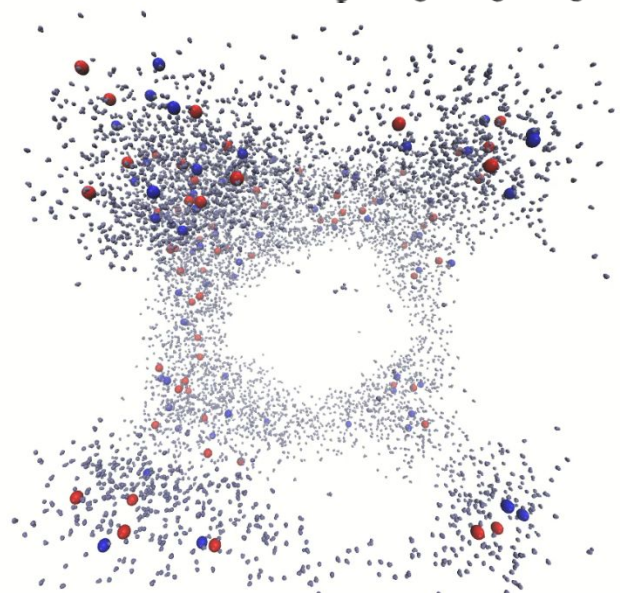

**Movie S2.** Disordered phase separation dynamics. Representative compilation of snapshots for 2-Ethylhexylamine (top) and Dipropylamine (bottom). Insets show the structure of a solvent molecule.
